# Supplementary material for: Flexibility vs rigidity of amphipathic peptide conjugates when interacting with lipid bilayers
Source: PubMed Central journal article supplement — Biochim Biophys Acta. 2017 Dec;1859(12):2505–15. doi: 10.1016/j.bbamem.2017.09.021 (PMC5667891; doi:10.1016/j.bbamem.2017.09.021), 2017-12
Supplement: mmc2.pdf [file mmc2.pdf]

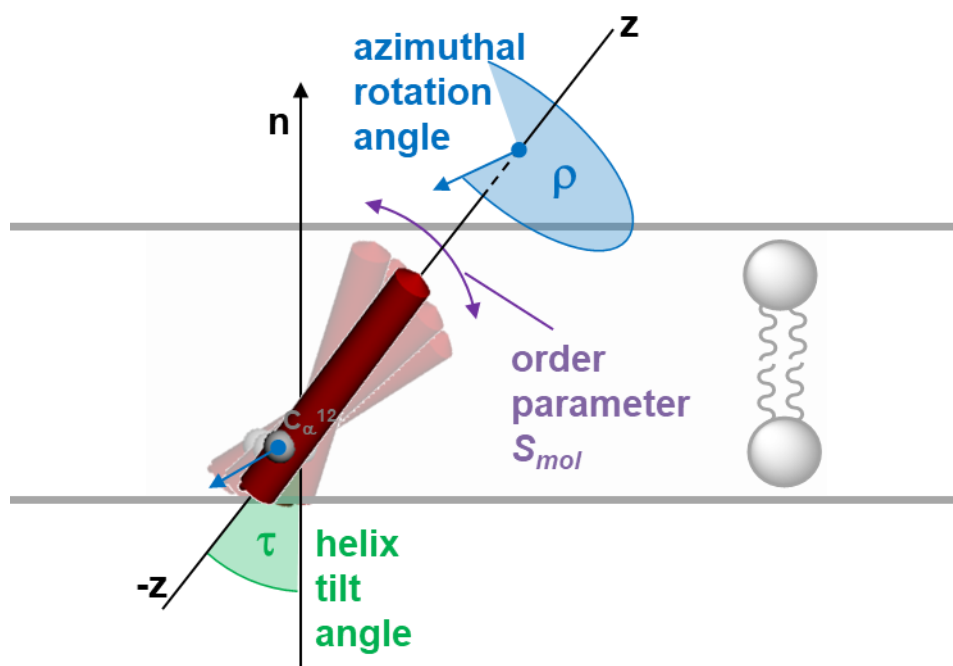

**Figure S1.** Definition of the angles  $\tau$  and  $\rho$ , which describe the orientation of a peptide molecule with respect to the lipid bilayer normal  $\mathbf{n}$ . The long axis,  $z$ , is defined by the longest director of a secondary structure motif (helix, strand, N-to-C direction).  $C_\alpha$  of an amino acid at position 12 defines the rotational angle  $\rho$ .

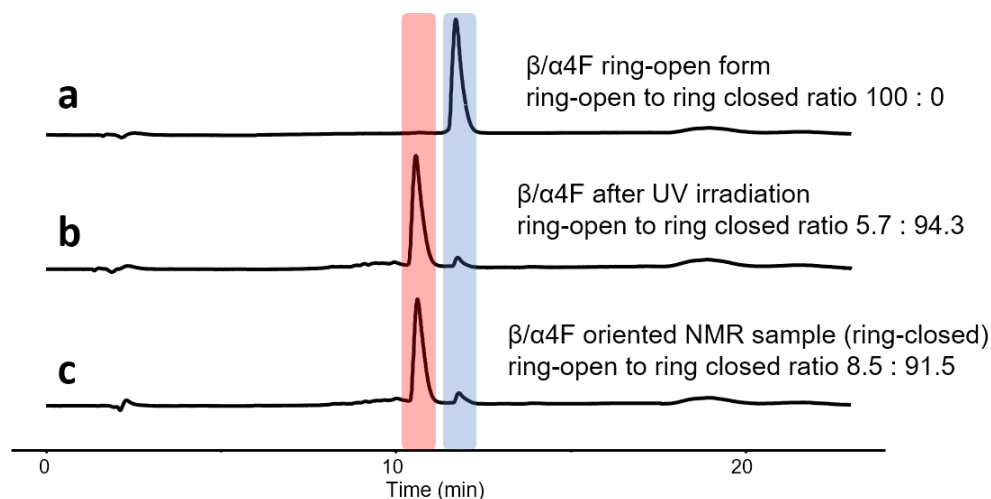

**Figure S2.** Example analytical RP-HPLC of the conjugate  $\beta/\alpha 4F$  in the flexible (ring-open) form before irradiation with UV light (a) and in the rigid (ring-closed) form after photoswitching (b). The chromatogram of the conjugate  $\beta/\alpha 4F$  in the ring-closed form extracted from the NMR sample after carrying out the NMR measurements (c). For each chromatogram the observed ratio between ring-open and ring-closed forms is given.

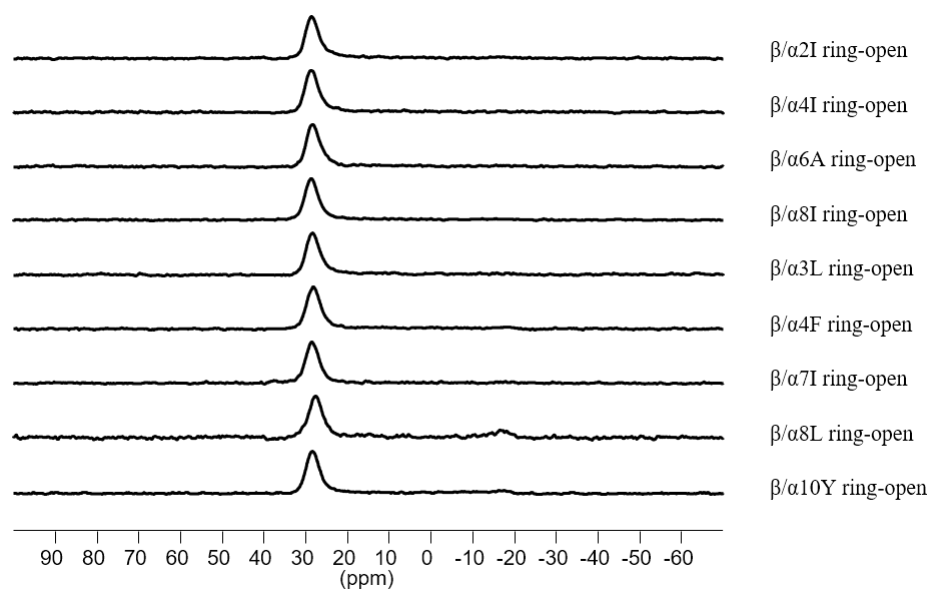

**Figure S3.** Solid-state  $^{31}\text{P}$ -NMR spectra of the  $\beta/\alpha$ -model labeled with Bpg. Conjugates were reconstituted in oriented DMPC bilayers ( $P/L = 1:100$ ) and measured at 40 °C in the flexible forms.

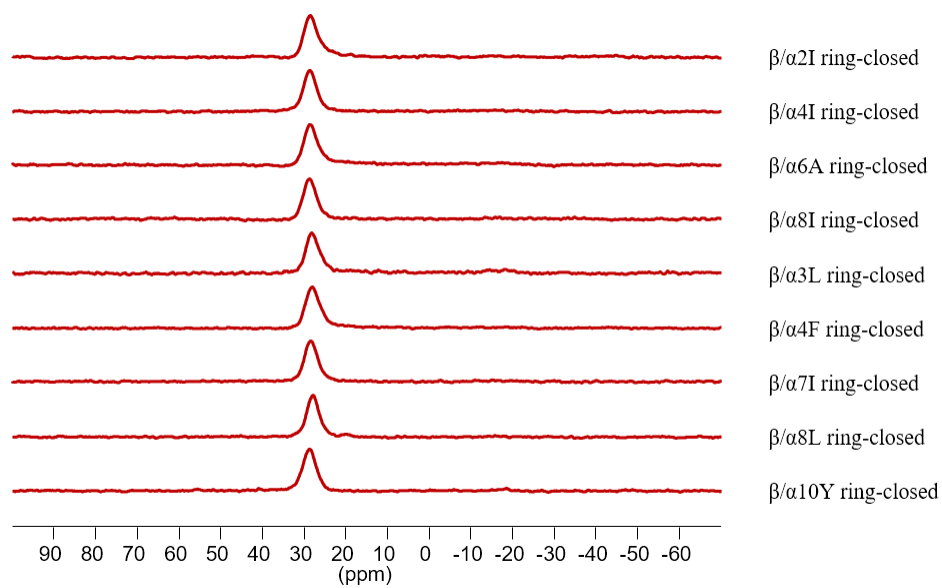

**Figure S4.** Solid-state  $^{31}\text{P}$ -NMR spectra of the  $\beta/\alpha$ -model labeled with Bpg. Conjugates were reconstituted in oriented DMPC bilayers ( $P/L = 1:100$ ) and measured at 40 °C in the rigid forms.

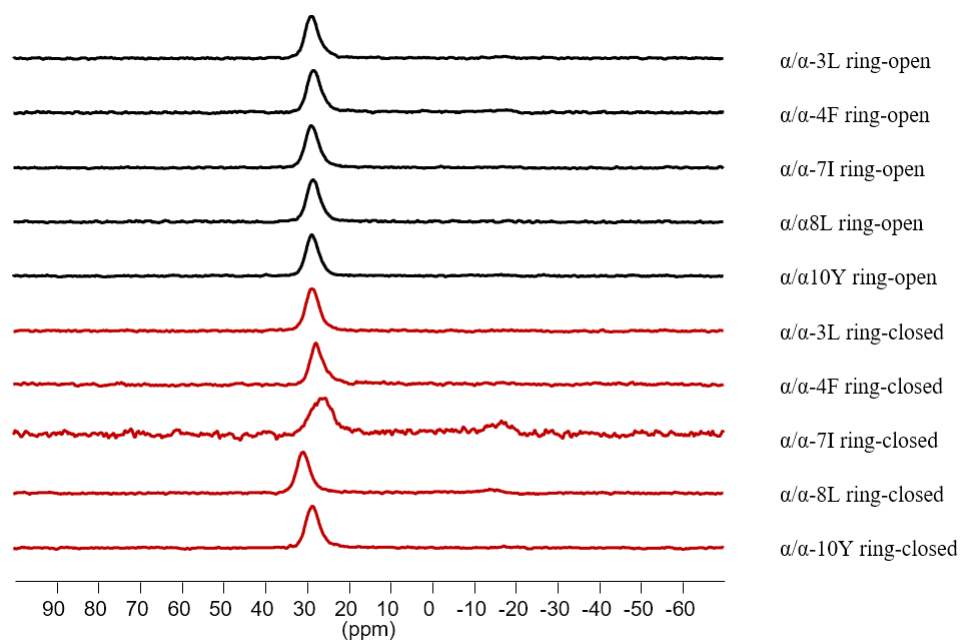

**Figure S5.** Solid-state  $^{31}\text{P}$ -NMR spectra of the  $\alpha/\alpha$ -model labeled with Bpg. Conjugates were reconstituted in oriented DMPC bilayers ( $P/L = 1:100$ ) and measured at 40 °C in the rigid (red lines) and flexible (black lines) forms.
